# Supplementary material
Source: MDPI journal article supplement (https://www.mdpi.com/2073-4352/13/11/1603)
Supplement: s1 [file s1]

# Highly Porous Layered Double Hydroxide and Mixed Metal Oxide By Sacrificial Bio-Template, Egg White Foam

Vidya Chandrabose <sup>1</sup>, Ji won Park<sup>1,2</sup>, Sang Yong Jung<sup>1,3</sup>, Kang Kyun Wang <sup>4\*</sup> and Jae-Min Oh<sup>1\*</sup>

1 Department of Energy and Materials Engineering, Dongguk University-Seoul, Seoul 04620, Korea; cbvidya1997@gmail.com.

2 Developing product quality innovation team, LG Display, Gyeonggi-do, 10845, Korea; qkrwldnjs324@naver.com

3 SN Bioscience, 422-Na, LH Business growth center, 54 Changeop-ro, Sujeong-gu, Seongnam-si, Gyeonggi-do, 13449, Korea; syjung05@naver.com

4 BI Bio-Photonics Co. Ltd., Gimpo-si, Gyeonggi-do, 10090, Korea.

\* Correspondence: jaemin.oh@dongguk.edu; biprimelab2020@gmail.com.

## 1. FT-IR

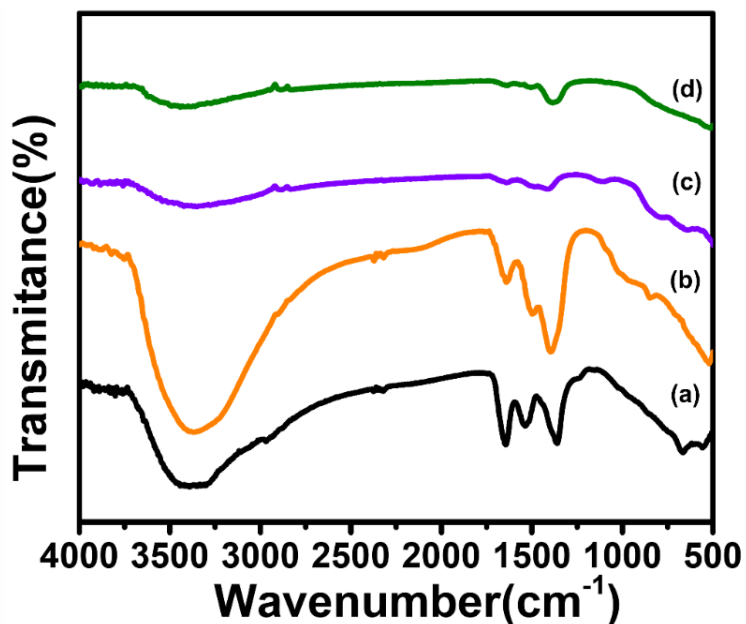

Figure S1. FT-IR spectra of (a) EWH, (b) LDH, (c) EWO, and (d) MMO.

## 2. Table S1. The crystallite size of EWH, LDH, EWO, and MMO.

|     | (003)<br>nm | (110)<br>nm | (200)<br>nm | (220)<br>nm |
|-----|-------------|-------------|-------------|-------------|
| EWH | 4.95        | 5.20        | -           | -           |
| LDH | 4.42        | 5.64        | -           | -           |
| EWO | -           | -           | 2.88        | 3.67        |
| MMO | -           | -           | 2.78        | 3.43        |
